# Supplementary material for: Where and When: Sharpening the lens on geographic disparities in mortality
Source: PubMed Central journal article supplement — SSM Popul Health. 2020 Oct 29;12:100680. doi: 10.1016/j.ssmph.2020.100680 (PMC7645634; doi:10.1016/j.ssmph.2020.100680), 2020-10-29
Supplement: mmc1.pdf [file mmc1.pdf]

### Variations in mortality rate by state of birth within state of residence

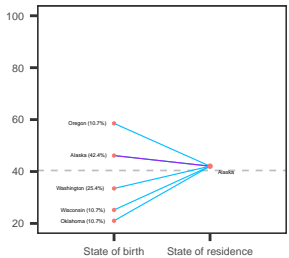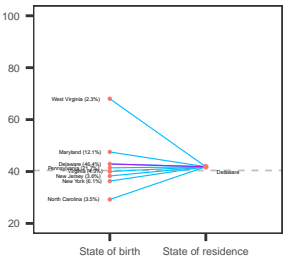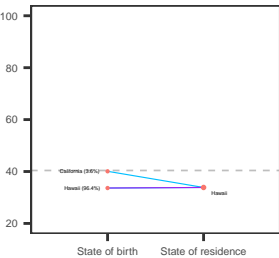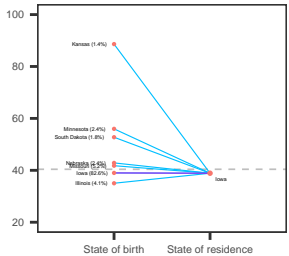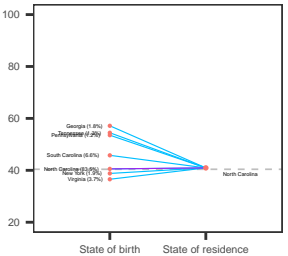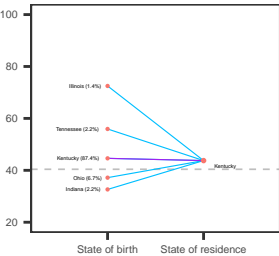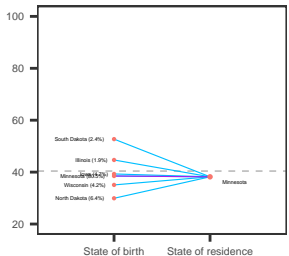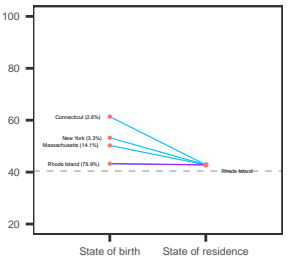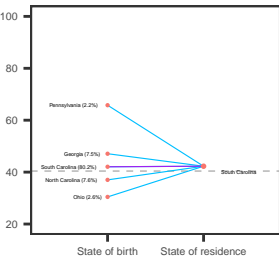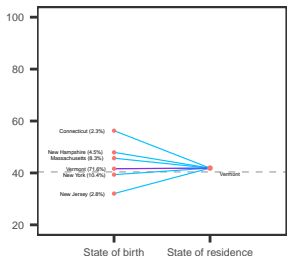

Age-standardized mortality rate, per 100 persons
