# Supplementary figures and images for: Where and When: Sharpening the lens on geographic disparities in mortality
Source: PubMed Central journal article supplement — SSM Popul Health. 2020 Oct 29;12:100680. doi: 10.1016/j.ssmph.2020.100680 (PMC7645634; doi:10.1016/j.ssmph.2020.100680), 2020-10-29

### Variations in mortality rate by state of residence within state of birth

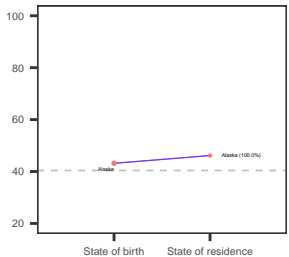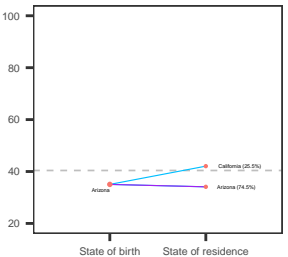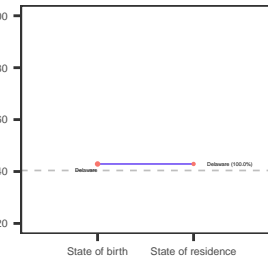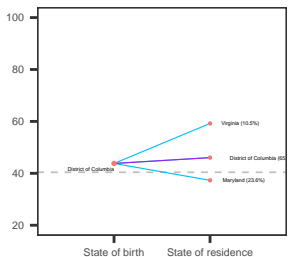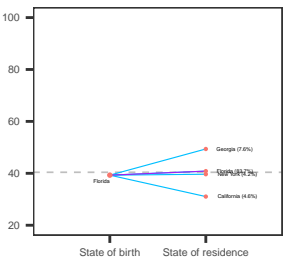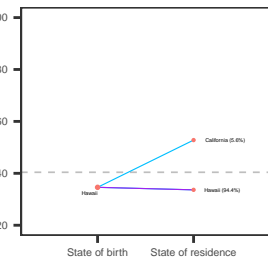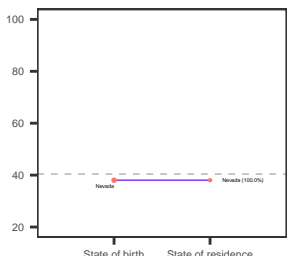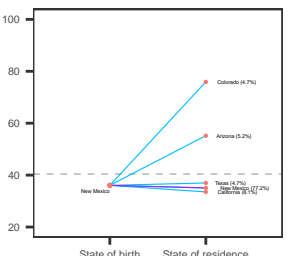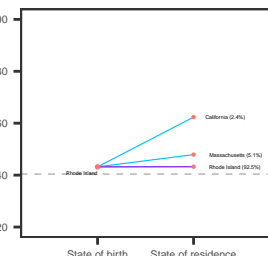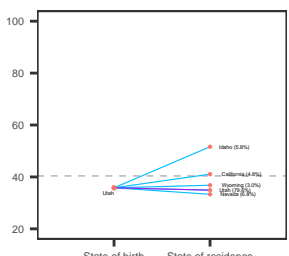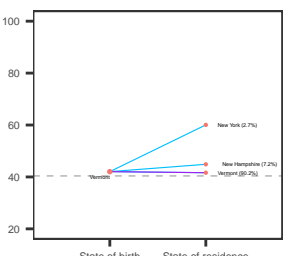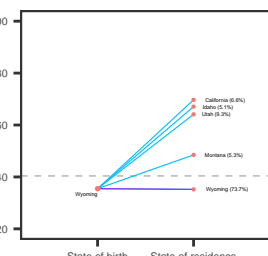

Supplement: mmc2.pdf [file mmc2.pdf]
